# Supplementary material for: Modeling policy interventions for slowing the spread of artemisinin-resistant pfkelch R561H mutations in Rwanda
Source: PubMed Central journal article supplement (PMC10667088; doi:10.1038/s41591-023-02551-w), 2023-09-21

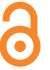

---

# Modeling policy interventions for slowing the spread of artemisinin-resistant *pfkelch* R561H mutations in Rwanda

---

In the format provided by the authors and unedited

**Supplemental Figure and Tables for “Optimal drug policy interventions for slowing the spread of the *pfkelch* R561H artemisinin-resistance mutation in Rwanda”, Zupko et al. (2023)**

**Table S1.** Population distribution of Rwanda (Malaria and Other Parasitic Diseases Division of the Rwanda Biomedical Center Ministry of Health [Rwanda] & ICF, 2018)

| Age Band | Population | Age Band | Population |
|----------|------------|----------|------------|
| < 5      | 15.1       | 45 – 49  | 3.6        |
| 5 – 9    | 14.1       | 50 – 54  | 3          |
| 10 – 14  | 14.5       | 55 – 59  | 3.1        |
| 15 – 19  | 9.6        | 60 – 64  | 2.2        |
| 20 – 24  | 7.3        | 65 – 69  | 1.2        |
| 25 – 29  | 6.9        | 70 – 74  | 0.9        |
| 30 – 34  | 6.5        | 75 – 79  | 0.6        |
| 35 – 39  | 6.1        | 80+      | 0.8        |
| 40 – 44  | 4.5        |          |            |

**Table S2.** Proportion of deaths that are attributable to malaria for 2012 to 2018 (Republic of Rwanda, Ministry of Health, n.d., p. 82)

|                          | 2012  | 2013  | 2014  | 2015  | 2016  | 2017  | 2018  |
|--------------------------|-------|-------|-------|-------|-------|-------|-------|
| < 5 due to Malaria       | 48    | 64    | 173   | 130   | 158   | 139   | 84    |
| < 5 all deaths           | 1647  | 1854  | 5080  | 4385  | 4162  | 3842  | 3802  |
| > 5 due to Malaria       | 314   | 401   | 416   | 401   | 685   | 244   | 241   |
| > 5 deaths               | 7379  | 7275  | 4356  | 7175  | 7846  | 5464  | 6249  |
| < 5 malaria proportional | 0.029 | 0.035 | 0.034 | 0.03  | 0.038 | 0.036 | 0.022 |
| > 5 malaria proportional | 0.043 | 0.055 | 0.096 | 0.056 | 0.087 | 0.045 | 0.039 |

**Table S3.** Malaria adjusted mortality rate used in the simulation, derived from UN population projections (UN, 2019).

| Age Band | Mortality Rate |
|----------|----------------|
| 0 – 1    | 0.02641        |
| 2        | 0.00202        |
| 3        | 0.00202        |
| 4        | 0.00202        |
| 5        | 0.00198        |
| 6        | 0.00247        |
| 7        | 0.00247        |
| 8        | 0.00247        |
| 9        | 0.00247        |
| 10       | 0.00247        |

| <b>Age Band</b> | <b>Mortality Rate</b> |
|-----------------|-----------------------|
| 11              | 0.00247               |
| 12 – 15         | 0.00247               |
| 16 – 20         | 0.00455               |
| 21 – 60         | 0.00455               |
| 61 – 100        | 0.05348               |

**Table S4.** Treatment seeking behavior in Rwanda (National Institute of Statistics of Rwanda et al., 2020).

| <b>Province</b>   | <b>Treatment Seeking</b> |
|-------------------|--------------------------|
| Northern Province | 53.3%                    |
| Eastern Province  | 63.4%                    |
| Kigali City       | 71.8%                    |
| Southern Province | 61.6%                    |
| Western Province  | 63.3%                    |

**Figure S1.** Projected 561H frequency when human movement is 0.3x the calibrated rate.

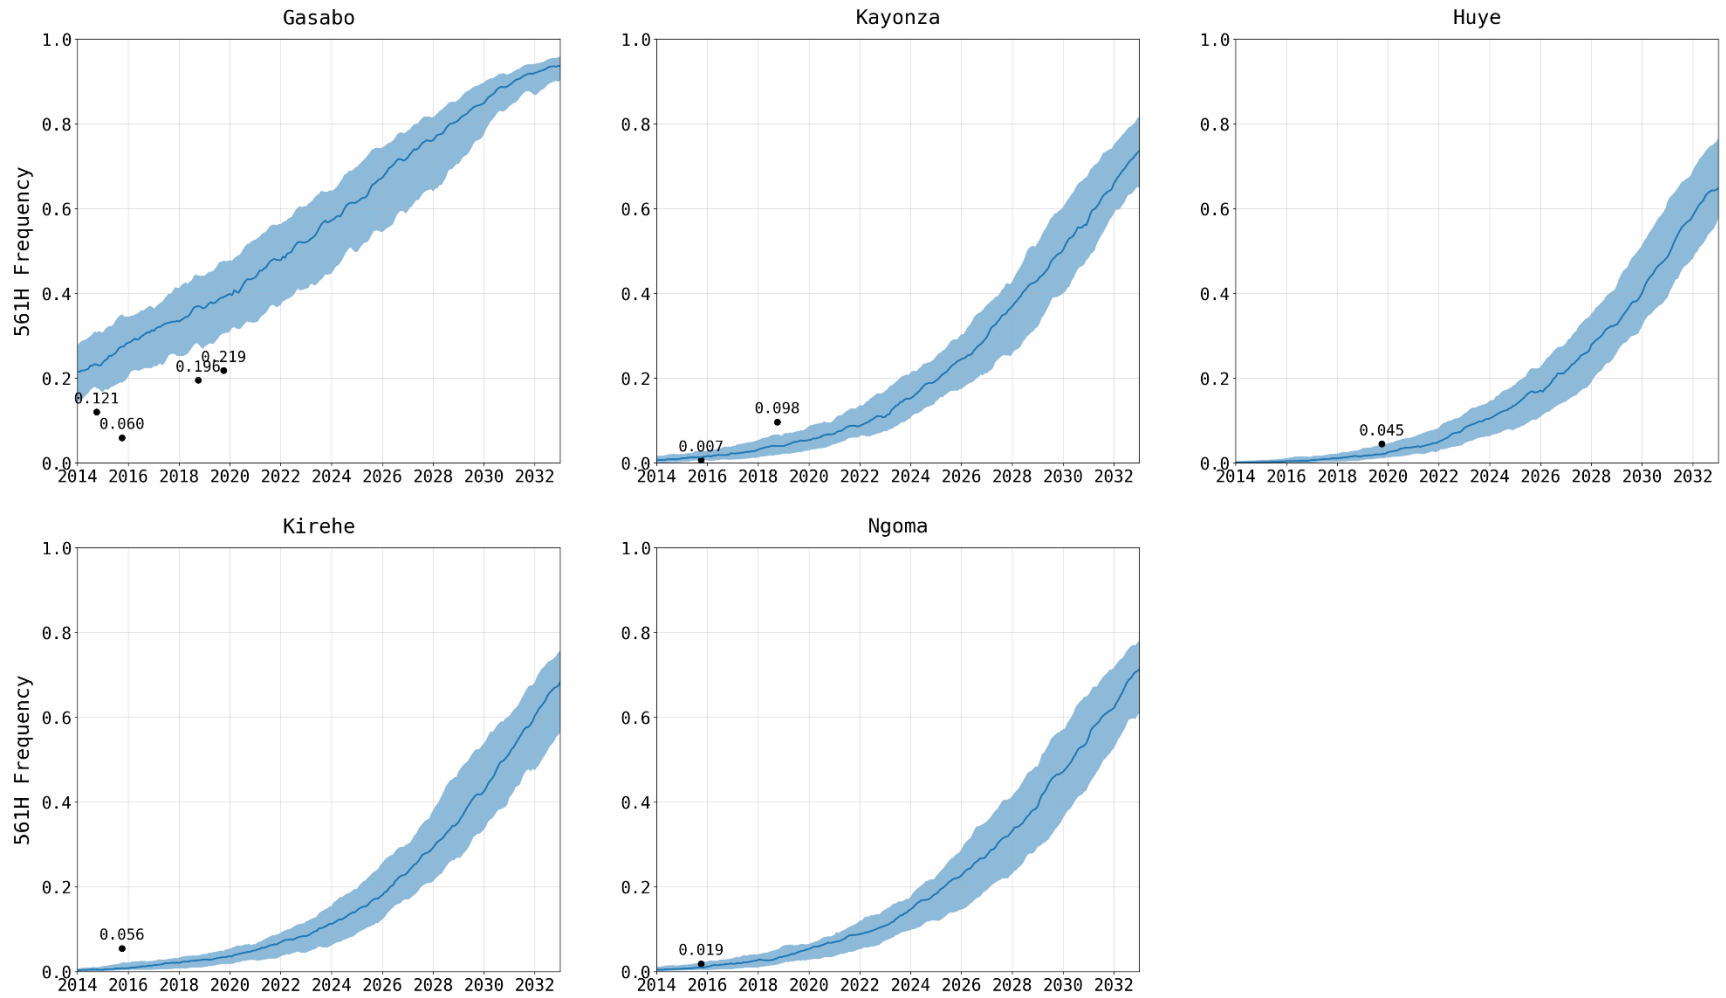

Figure S2. Projected 561H frequency when human movement is 0.5x the calibrated rate.

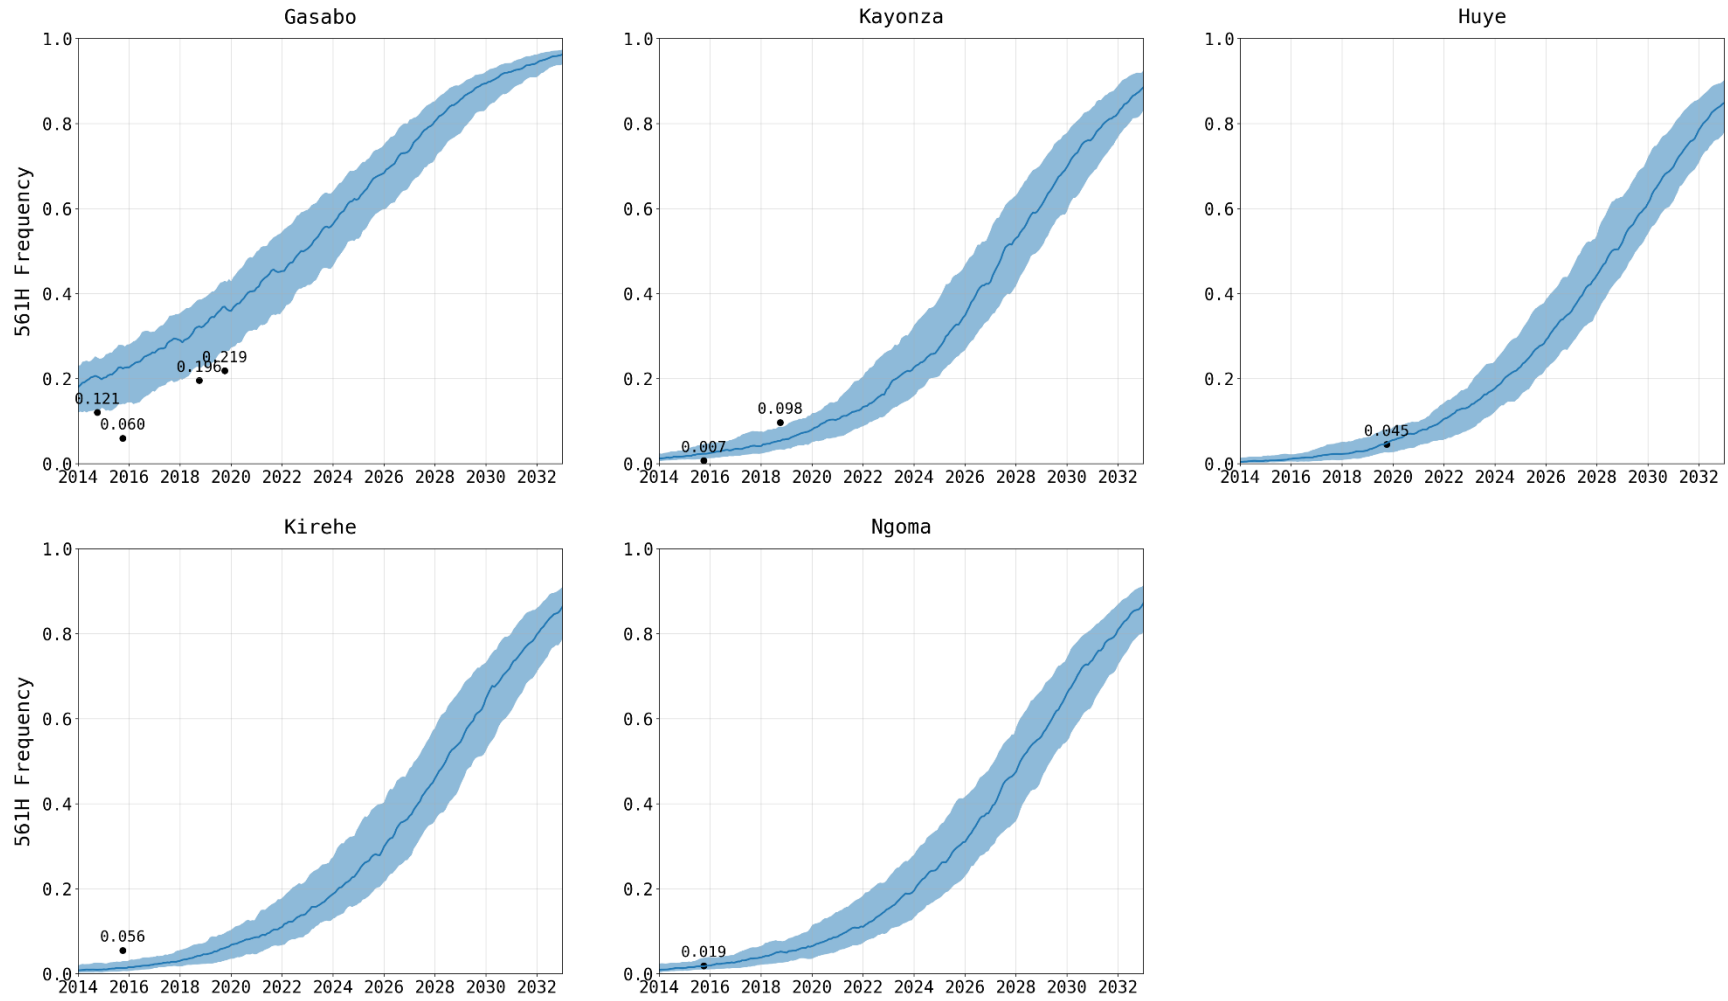

**Figure S3.** Projected 561H frequency when human movement is 2x the calibrated rate.

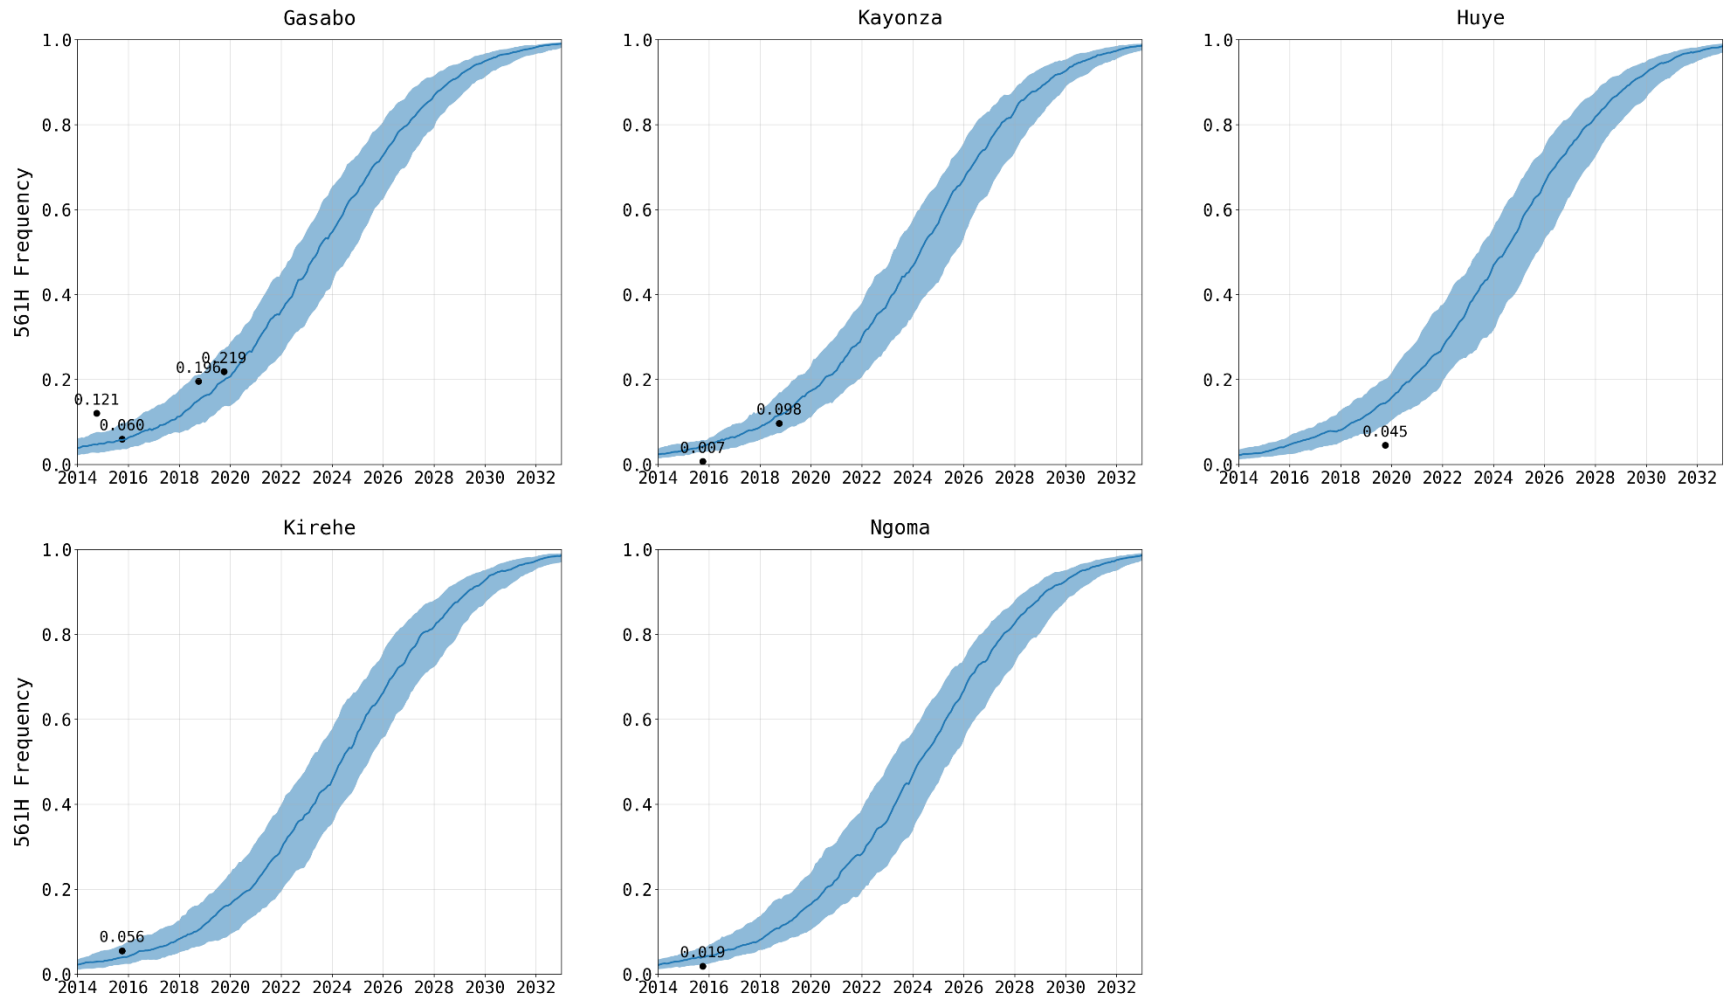

**Figure S4.** Projected 561H frequency when human movement is 3x the calibrated rate.

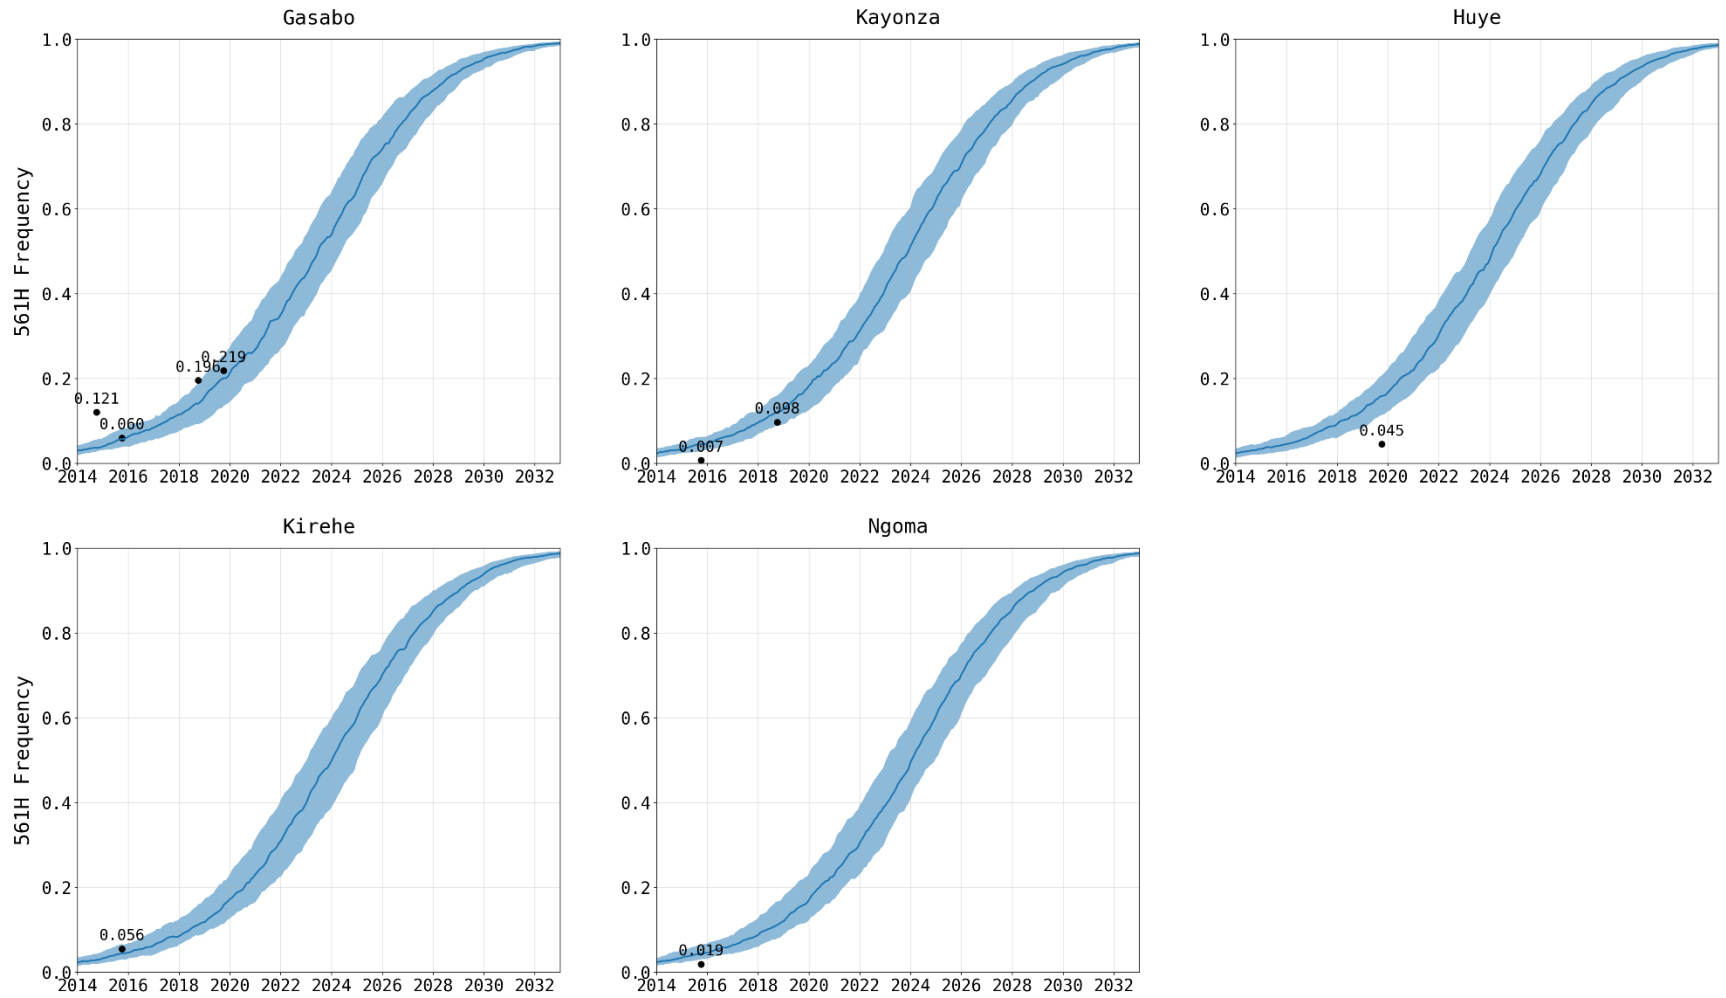

**Figure S5.** District level 561H frequency when the fitness penalty is increased to 10x the calibrated value and the introduction of 561H was through the one-time mutation of 20% of the infected individuals in Gasabo.

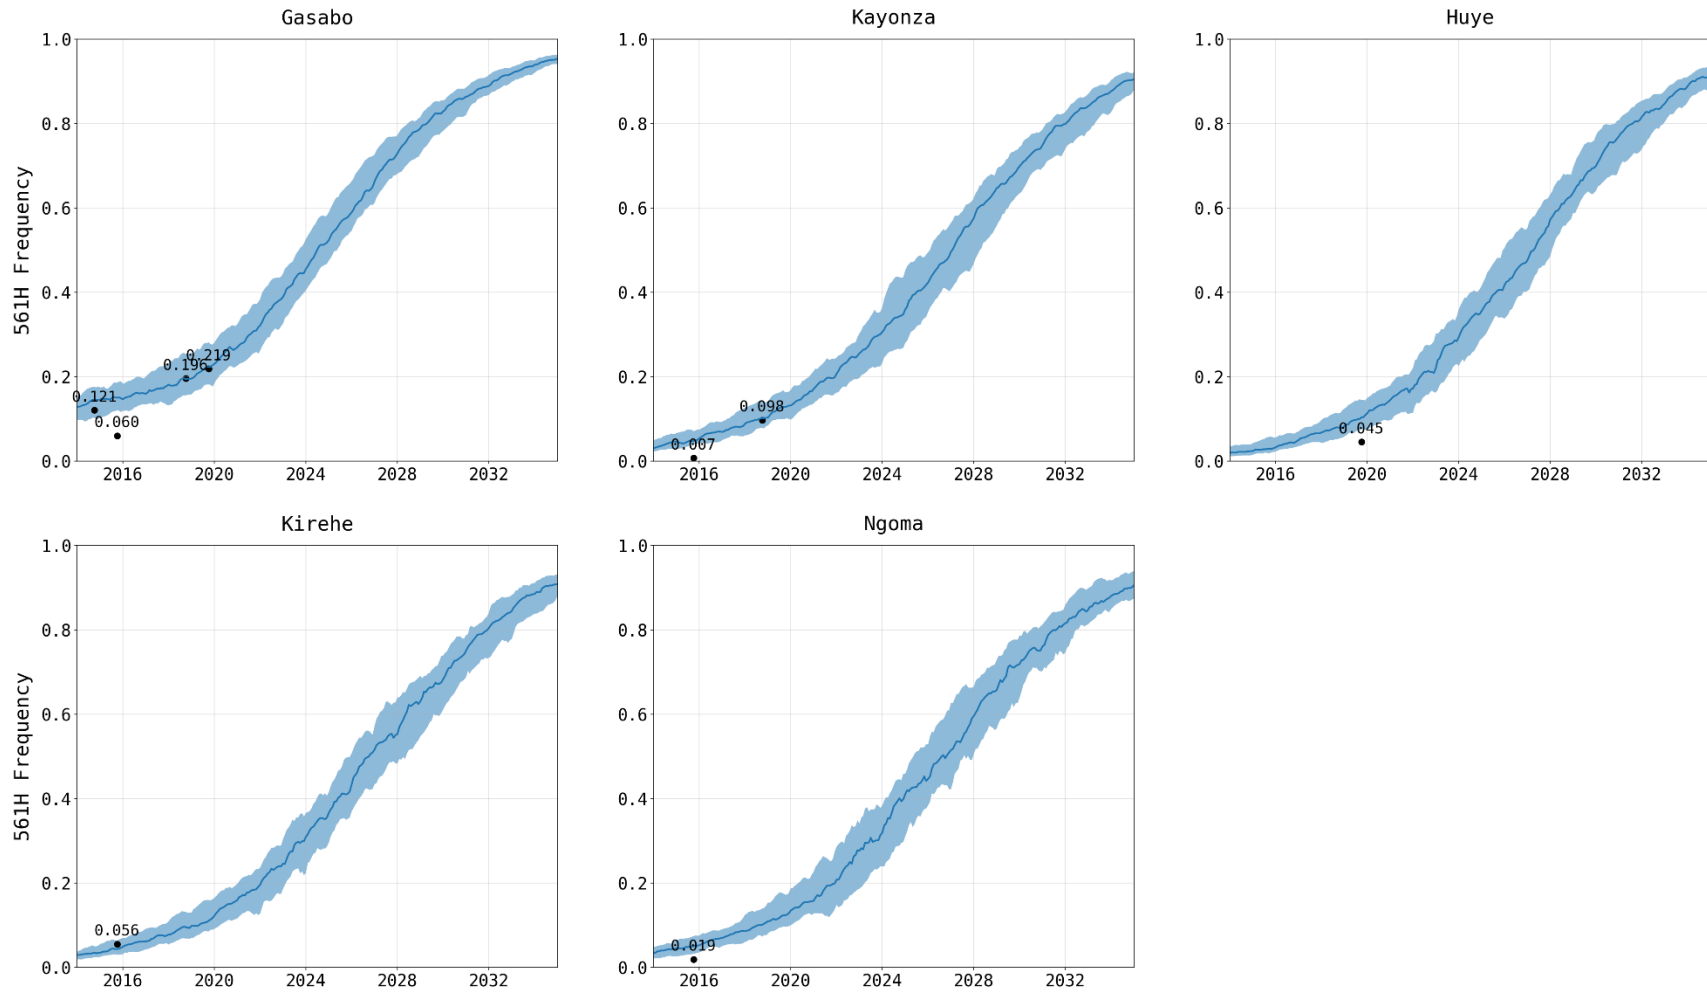



**Figure S6.** District level 561H frequency when the fitness penalty is increased to 25x the calibrated value and the introduction of 561H was through the one-time mutation of 50% of the infected individuals in Gasabo.

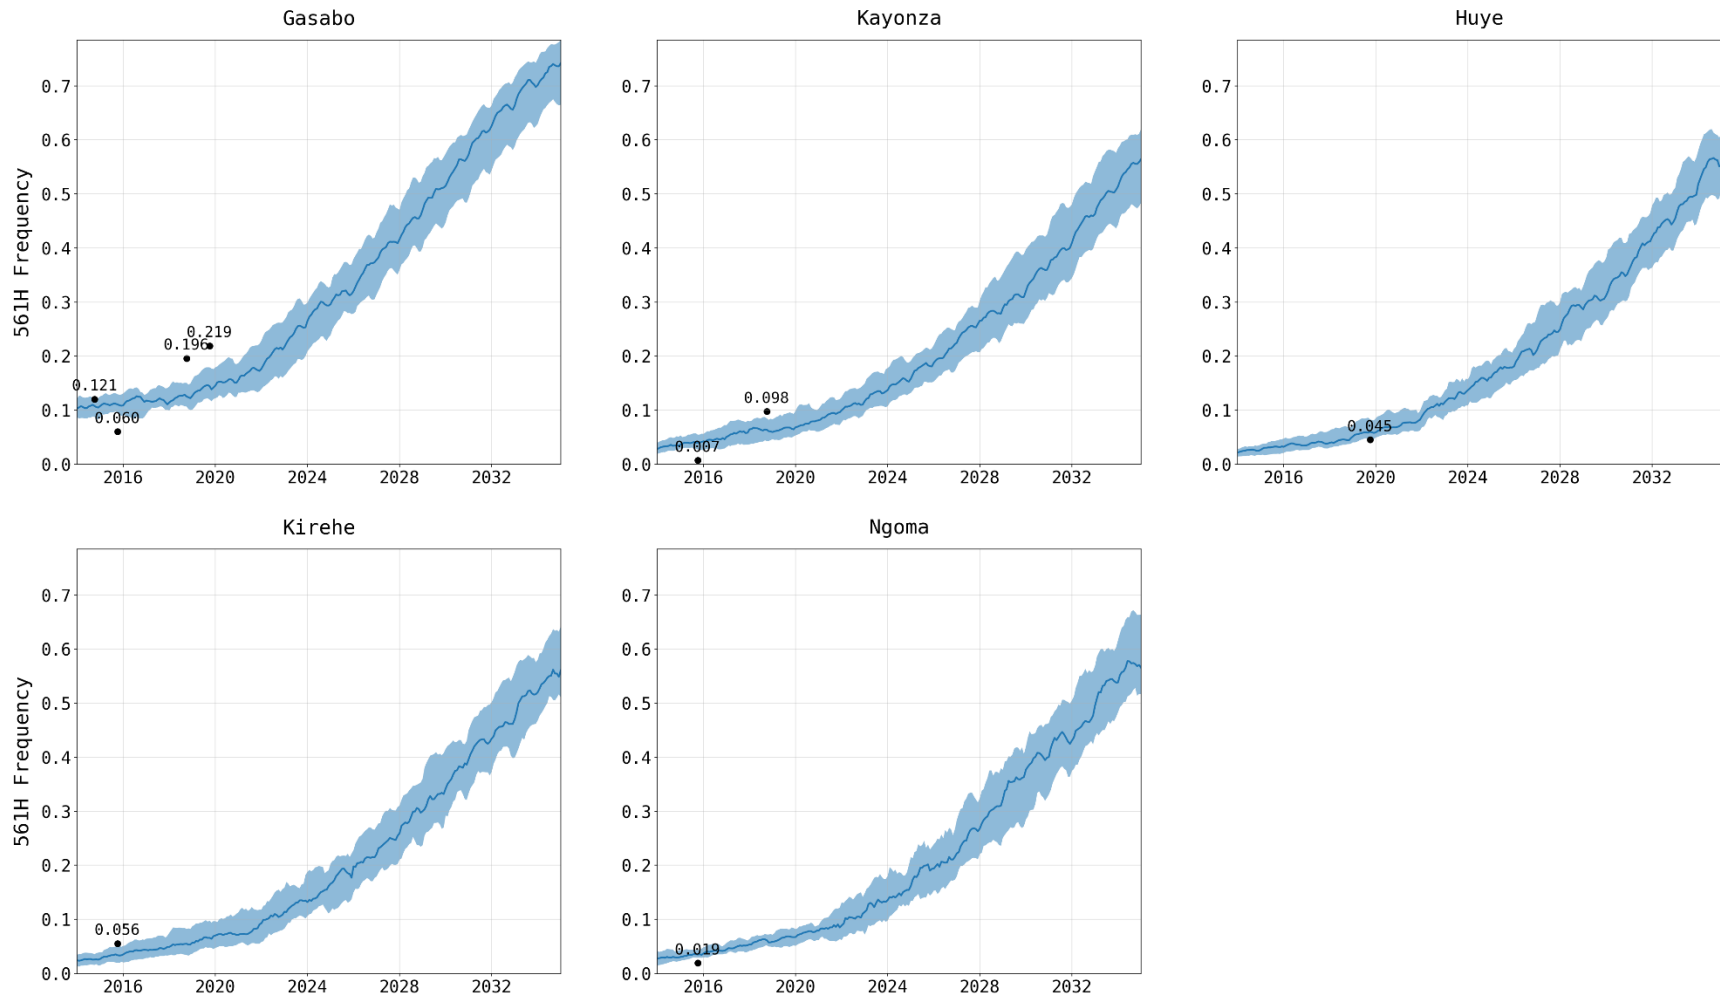

**Figure S7.** District level 561H frequency when the fitness penalty is increased to 50x the calibrated value and the introduction of 561H was through the one-time mutation of 75% of the infected individuals in Gasabo.

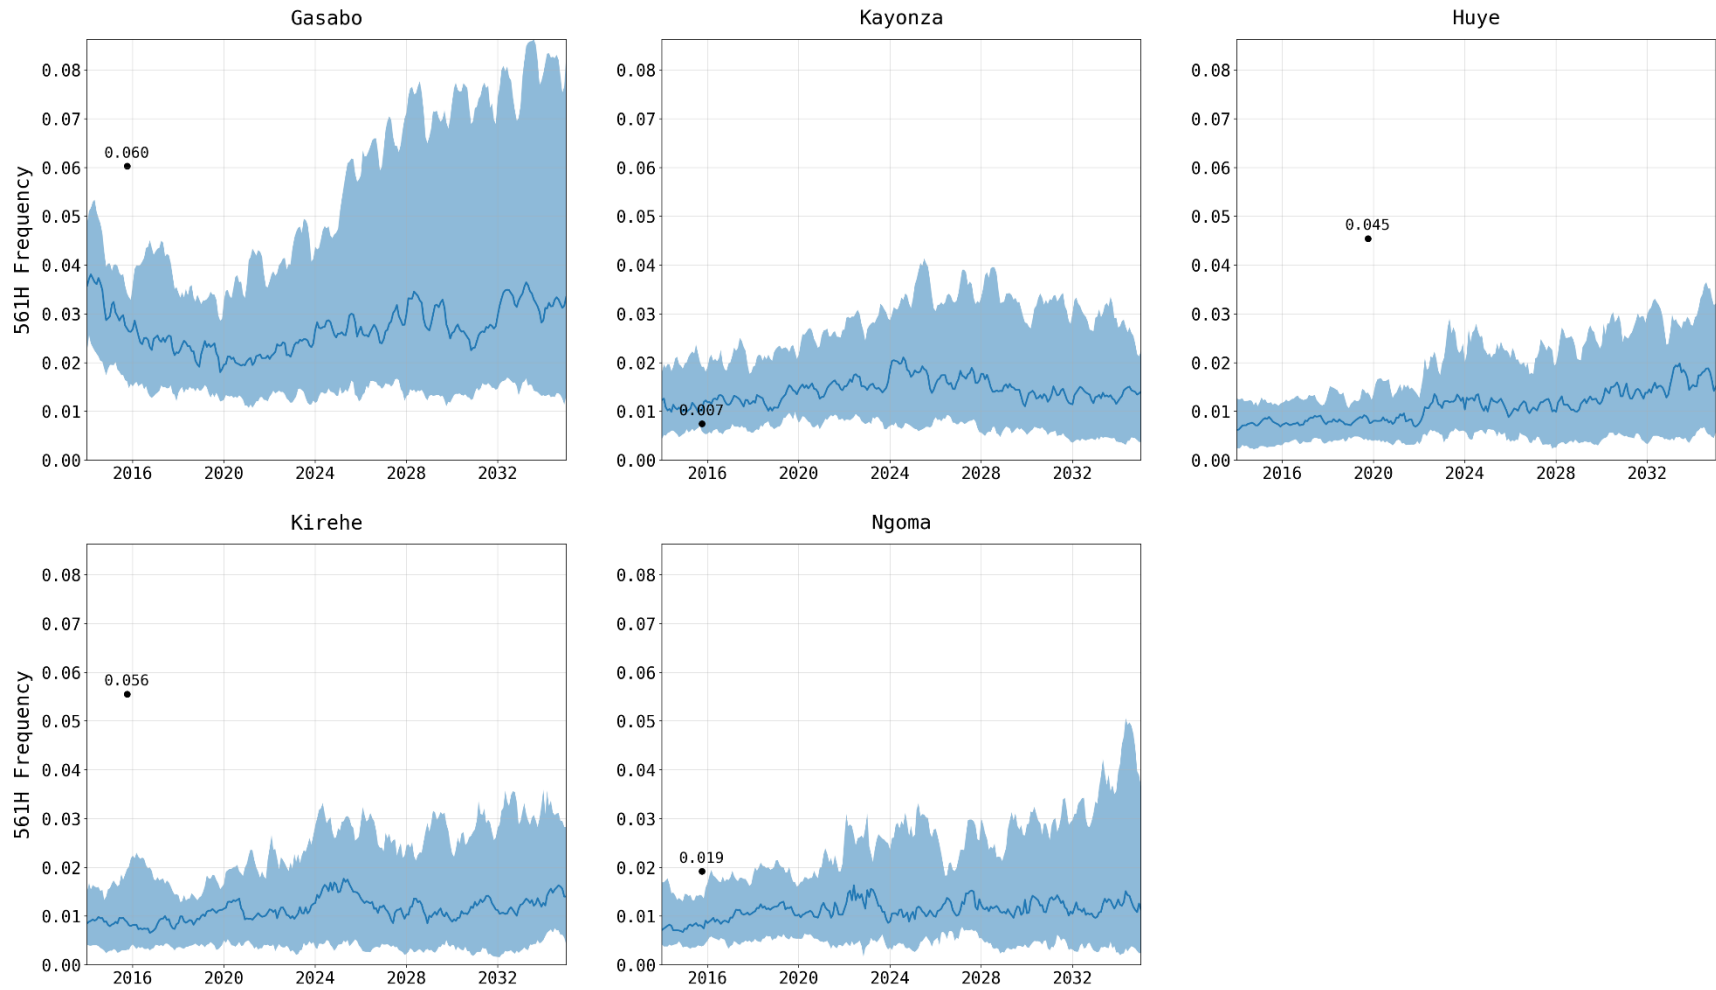

Supplement: 41591_2023_2551_MOESM1_ESM.pdf [file 41591_2023_2551_MOESM1_ESM.pdf]
